# Supplementary material for: The MAP Kinase PvMK1 Regulates Hyphal Development, Autophagy, and Pathogenesis in the Bayberry Twig Blight Fungus Pestalotiopsis versicolor
Source: J Fungi (Basel). 2023 May 24;9(6):606. doi: 10.3390/jof9060606 (PMC10299636; doi:10.3390/jof9060606)
Supplement: Supplementary file 1 [file jof-09-00606-s001.zip › Table S1 Primers used in this study.xlsx]

## Sheet: Sheet1
Primer name	Sequence (5' - 3')	Purpose
Y0044F	CGCTCTGATGTTTGTCC	Amplification of PvMK1 gene locus
Y0044R	CAGGCAGTATCTTTGGTC
Y0063F	GTCACCAGCCCCTGGGTTGAATTCCCCGTCTGATTGTTTC	PvMK1 upstream fragment for pDH-PvMK1 vector
Y0063R	AATGCTCCTTCAATATCAGAATTCGTCGGTTTGATGTGGT
Y0064F	CGACCTGCAGGCATGCAAGCTTGGCACAGGAAAGAGGA	PvMK1 downstream fragment for pDH-PvMK1 vector
Y0064R	AACGACGGCCAGTGCCAAGCTTGGATCGCAAGAGCACA
Z0660-F	GTCACCAGCCCCTGGGTTGAATTCGCCATTCGTTCCACAT	pCOM-PvMK1 vector construction
Z0660-R	TCCCCGGGTACCGAGCTCGAATTCACCCTGCCATTACCAC
Y0154F	GTGCTTACGGAGTTGTTT	internal primer of PvMK1 gene
Y0154R	AGGTCGGAGGTCTTGG
Y0156F	GTGTCCAACCTCCTCATC	qRT-PCR analysis of melanin gene PvPKS1
Y0156R	AGAAGCCGCAAAGTGT
Y0157F	GGGGCGAGTTTGACTT	qRT-PCR analysis of melanin gene PvSCD1
Y0157R	GTGACTCTGCCATGCTG
Y0158F	GCCTCGCCAAGATGTG	qRT-PCR analysis of melanin gene PvT3HR
Y0158R	CAACGCAAGACCTGTCC
Y0159F	TGAGTACGCCGCCACA	qRT-PCR analysis of melanin gene PvT4HR
Y0159R	ACCTTGCCGTTGACCC
Y0160F	GGAAAGTTCTCGCTGCTC	qRT-PCR analysis of melanin gene PvAYG1
Y0160R	TGCCTGGGACAAATCG
Y0161F	GCCCTGCCAACTCAAC	qRT-PCR analysis of nitrogen metabolism gene PvAREA
Y0161R	GCGTCATACCGAACCC
Y0162F	CGCAACGCAAACAGGA	qRT-PCR analysis of nitrogen metabolism gene PvAREB
Y0162R	CGATAGCGGCAACAGC
Y0163F	CGTCCGACTTCCTCAC	qRT-PCR reference of actin gene PvACT1
Y0163R	TACCTCCCGACAGCAC
Y0166F	CGGCTGCGAACTTTCA	qRT-PCR analysis of autophagy gene PvATG1
Y0166R	GCGTTGCCTTGTGACTT
Y0167F	ACGCCATTATTGCCATTC	qRT-PCR analysis of autophagy gene PvATG2
Y0167R	TCGTCGGTGCCTGTCTC
Y0168F	CGGCTGTACCTTTCGG	qRT-PCR analysis of autophagy gene PvATG3
Y0168R	GACGGTCTTGTCCTTGTAAT
Y0169F	ATGCCGCAGTCTATTGG	qRT-PCR analysis of autophagy gene PvATG4
Y0169R	AAGCAGGACGGGTGAA
Y0170F	CGGGTCAATGATAGAACA	qRT-PCR analysis of autophagy gene PvATG5
Y0170R	CGAGAATGGCACAGGA
Y0171F	ATCATTCGCTACGACCAT	qRT-PCR analysis of autophagy gene PvATG6
Y0171R	GAGGCATATCTCCAGACG
Y0172F	CGAGACCAGGTGTTGC	qRT-PCR analysis of autophagy gene PvATG7
Y0172R	GGTATGACTTTCCAGCA
Y0173F	CAGCATCTACGAGGAACA	qRT-PCR analysis of autophagy gene PvATG8
Y0173R	AAGCGGACTCGCCAAA
Y0174F	CAACCCACCTCCCTCCT	qRT-PCR analysis of autophagy gene PvATG9
Y0174R	GGCAACGCCTGACCAA
Y0175F	TTCGTGGTGCTGGTCC	qRT-PCR analysis of autophagy gene PvATG10
Y0175R	GAGATAATCCTCCTTTGC
Y0176F	AGTGCCTTAGCTTCCG	qRT-PCR analysis of autophagy gene PvATG11
Y0176R	CACAGCCTTTCCCTTG
Y0177F	CCCACGAGGGACTGTTTC	qRT-PCR analysis of autophagy gene PvATG12
Y0177R	AAGGCTGGCGTCATAGAATA
Y0178F	TCAGACAGGCTTCTTCAT	qRT-PCR analysis of autophagy gene PvATG13
Y0178R	GATCCTCGTCCACTACC
Y0179F	CCCGAACGACCTTGAC	qRT-PCR analysis of autophagy gene PvATG14
Y0179R	TCGCATCCTGTGAGCC
Y0180F	TGCTACACCAGGTTGG	qRT-PCR analysis of autophagy gene PvATG15
Y0180R	GAAGTTATGGGATGAGATG
Y0181F	GGGCGACGACAAGAAGC	qRT-PCR analysis of autophagy gene PvATG16
Y0181R	GGATGTTGAGCGTGAGGTT
Y0182F	GCACGAAAGCATAGGT	qRT-PCR analysis of autophagy gene PvATG17
Y0182R	AGGAGCCAGCGTAGTT
Y0183F	GAGACAGAGCGGTTCATT	qRT-PCR analysis of autophagy gene PvATG18
Y0183R	GATAGTTGCCCACGACA
Y0184F	CCCAAGTTGTATCTGCTC	qRT-PCR analysis of autophagy gene PvATG20
Y0184R	CCATTCAATCTGGCTCT
Y0185F	GAGACAGAGCGGTTCATT	qRT-PCR analysis of autophagy gene PvATG21
Y0185R	GATAGTTGCCCACGACA
Y0186F	TGGTGGTCTCAGTTCATA	qRT-PCR analysis of autophagy gene PvATG22
Y0186R	GACGCTTGATCCCTTA
Y0187F	ATACCGACCAGGATTACC	qRT-PCR analysis of autophagy gene PvATG24
Y0187R	TGCTCCCGTGCTTTCA
Y0188F	TATCCGACCGTTCTTT	qRT-PCR analysis of autophagy gene PvATG26
Y0188R	ATAATACGCTCGCTGTT
Y0189F	TACCTCACGGCGACAC	qRT-PCR analysis of autophagy gene PvATG27
Y0189R	CACGGCTACCACTTCC
Y0190F	GATGACTCGGAATGAGC	qRT-PCR analysis of autophagy gene PvATG28
Y0190R	CAGATCGGCAGGGACT
Y0191F	AAAACAGCCCAAACAAC	qRT-PCR analysis of autophagy gene PvATG29
Y0191R	AGCCTTACCGCCAGAT
Y0192F	TACCGACGGCTCACTC	qRT-PCR analysis of autophagy gene PvATG32
Y0192R	CAAATGTCCTCAGGTGC
Y0193F	AGGGCAGTAGCGAGGAC	qRT-PCR analysis of autophagy gene PvATG33
Y0193R	CTGGACCAGGTGGTTCTT
Y0194F	TGGAGTCGGCCTACTTG	qRT-PCR analysis of autophagy gene PvATG36
Y0194R	GTCCCGTTGAGGGTGT
Y0195F	TCGGAAGGAGGTCTCG	qRT-PCR analysis of autophagy gene PvATG38
Y0195R	CTCGTTGGTTGGGTGC
Y0196F	CAGAAGGAAGTGGAGGCA	qRT-PCR analysis of autophagy gene PvATG39
Y0196R	ACGAGCACCGATGAAA
Y0197F	AACAAGCCCGAAGTCA	qRT-PCR analysis of autophagy gene PvATG42
Y0197R	AGGAACGAGCAGGTGG
