# Supplementary material for: The MAP Kinase PvMK1 Regulates Hyphal Development, Autophagy, and Pathogenesis in the Bayberry Twig Blight Fungus Pestalotiopsis versicolor
Source: J Fungi (Basel). 2023 May 24;9(6):606. doi: 10.3390/jof9060606 (PMC10299636; doi:10.3390/jof9060606)
Supplement: Supplementary file 1 [file jof-09-00606-s001.zip › Table S2 Gene sequences used for qRT-PCR.xlsx]

## Sheet: Sheet1
Gene name	CDS	Length	Protein	Length
PvMK1	ATGTCGCGAGCTCAGGCACCTAACCCTGCGGGGTCCCGCAAGATCTCCTTCAATGTGAGCGAGCAGTACGACATTCAGGATGTGGTTGGCGAGGGTGCTTACGGAGTTGTTTGCTCGGCAATCCACAAGCCTTCCGGCCAAAAGGTGGCCATTAAGAAGATCACTCCCTTTGATCACTCCATGTTCTGTTTGAGAACCCTCAGAGAGATGAAGCTTCTGCGCTACTTCAACCACGAGAACATCATCTCCATTCTGGACATTCAGAAGCCCCGAAACTATGAGACGTTCCAGGAGGTTTACCTCATCCAGGAACTCATGGAGACGGATATGCACAGAGTTATCCGCACTCAGGACCTTTCCGACGACCACTGCCAGTACTTCATTTACCAAACCCTGCGT…	1068	MSRAQAPNPAGSRKISFNVSEQYDIQDVVGEGAYGVVCSAIHKPSGQKVAIKKITPFDHSMFCLRTLREMKLLRYFNHENIISILDIQKPRNYETFQEVYLIQELMETDMHRVIRTQDLSDDHCQYFIYQTLRALKAMHSANVLHRDLKPSNLLLNANCDLKVCDFGLARSAASQEDNSGFMTEYVATRWYRAPEIMLTFKEYTKAIDVWSVGCILAEMLSGKPLFPGKDYHHQLTLILDVLGTPTMEDYYGIKSRRAREYIRSLPFKKKVPLRTLFPKTSDLALDLLEKLLAFNPVKRITVEDALKHPYLEPYHDPEDEPTAPPIPEEFFDFDKHKDNLSKEQLKQLIYQEIMR	355
PvSCD1	ATGGTCAACGGAAACATCACATTTGACGACTACCTGGGCCTCCAGCAGTGCCTCGTCGAGTGGGCGGATAGTTATGATAGCAAGGACTGGAGCAGATTAAGGAAATGCATTGCTCCTACACTGAGGATCGACTACCGATCCTTCCTTGACAAGATCTGGGAAGCTATGCCCGCCGAAGAGTTCATCGCCATGATTTCGGACAAGGCCGTGCTCGGCGACCCGCTGCTCATGACCCAGCACTTCATCGGCGGTACAAAGTGGGAAAAGGTTAGCGAGACCGAGGTCATTGGCGTGCACCAGCTGCGTGTCCCCCACCAGAGGTACACGGACGAGTCGAGAAAGACGGTCGCCGTAAAGGGCCACGCCCACAGCACCAACACCCACTGGTACCGCAAGGTC…	579	MVNGNITFDDYLGLQQCLVEWADSYDSKDWSRLRKCIAPTLRIDYRSFLDKIWEAMPAEEFIAMISDKAVLGDPLLMTQHFIGGTKWEKVSETEVIGVHQLRVPHQRYTDESRKTVAVKGHAHSTNTHWYRKVNGEWKFAGLCPEIRWGEFDFDKVFASGRETFGTEDAAAEGIPAKHQQQQQHGRVTVSAV	192
PvPKS1	ATGGCGGAGCAGATGTCTTATCTCCTTTTTGGAGACCAGTCTCTCGACACCCACGGGTTCCTGGCTGATTTCTTCAAGCAAGGGAAGCCGAGTATCCTTGCCAAGACGTTCCTCAAGGAAGTGGGAGATGCTTTGAGGCTCGAGATTGAAAGGCTTCCACGATGCGAAAGAATTCTCCTCCCAGTATTTCAGACTCTGCAACAATTAAACGAGAGGTATCACAACCAAGAAACCAAATATCCAGGAGTCGACAGTGCTCTATTGTGTATAACACAACTAGCGCATTATATTGATCGATGCGAAAAAGAGCACCAAGATGTCACAGCGGCCGAGAACACATACCTATCCGGTCTTTGCACCGGCCTTTTCGCCGCAACAGCGATCGCCTCGAGTCCATCG…	6468	MAEQMSYLLFGDQSLDTHGFLADFFKQGKPSILAKTFLKEVGDALRLEIERLPRCERILLPVFQTLQQLNERYHNQETKYPGVDSALLCITQLAHYIDRCEKEHQDVTAAENTYLSGLCTGLFAATAIASSPSLSSLIPIAIQVSLMAYRVGSHVASLAERLSPATGSSESWTYVVPGAKETDAKPILQEFHETEGISQAAQAYISAVSASNIAISGPPATLKSLFSKDLFDSRPTAIPVYGPYHAPHLHAAANLDKILRLDSEAATAAFDGSKPRSHIISCVTGQPFPETETKALLKAVVHEILNEPLLFHKALKGSLNSAKEFKGSRVLVIPYGPTQAASTLANLLKAQTKLEVVLRTPPQVSRESNGANIGNHGSTGKCKLAIVGMAGRFPDAASH…	2155
PvT3HR	ATGTCTCCCTCGGCAACCCACAATATTACCTCGGACCTGCCTAGCAGCCAACAACAGCAAAGACCGTTTGCGGGCAAGGTTGCTCTTATCACGGGCTCCGGTCGAGGCATTGGTAGGGGTATCGCGCTGGAGCTGGGCAAGCGCGGCGCCTCCTGCGTGATCAACTACTCCAGAAGTTCCAAGCATGCTGAGGAGGTCGTGGCTGAACTTGCCAAGTACGGCTCCAAATCCATTGCCCTGCAGGCCGACATCTCCAACCCCGCCGAGGTCGCCCAGCTCTTTGAGAAGGCGCTGAGGCACTATGGCCACATAGACTTTGCCGTCTCGAACAGCGGCATGGAAGTCTGGTGCGAGGAGACCGAGGTGACGCCGGAGCTCTTTGACCAGGTCTTCAACCTC…	837	MSPSATHNITSDLPSSQQQQRPFAGKVALITGSGRGIGRGIALELGKRGASCVINYSRSSKHAEEVVAELAKYGSKSIALQADISNPAEVAQLFEKALRHYGHIDFAVSNSGMEVWCEETEVTPELFDQVFNLNTRGQFFVAQNALKHCSEGGRIILTSSIAAQMTGIPNHALYAGSKAAVEGFARSFAVDCGKKRITCNALAPGGIQTDMFDENSWHYVPGGYQGMPIDTIKNGLAKMCPLNRVGTPADIGKIVCMLVSEEGEWINGQVLRCSGGGV	278
PvT4HR	ATGCCTGGCGTCACTTCCGAGCGTACTGCTAGCAGATTCGATGCTATTCCCGGTCCTCTGGGTCTGGCTTCTGCCTCTCTCGAGGGCAAGGTTGCGCTAGTTACTGGTGCTGGCCGTGGTATCGGCAGGGAAATGGCCCTGGAGCTGGGTCGTCGCGGCGCCAAGGTCATTGTCAACTACGCCAACAGCTCCGAGTCGGCCCAGGAGGTCGTCAACGCCATCAAGAAGTCGGGCTCCGACGCCGCCGCCATCAAGGCCAACGTGTCGGACGTGGACCAGATCGTCAAGCTCTTTGACCAGGCCGTCAAGGTCTGGGGCAAGCTCAACATTGTCTGCTCCAACTCGGGCGTCGTCTCGTTCGGCCACGTCAAGGACGTCACCCCCGAGGAGTTTGACCGC…	849	MPGVTSERTASRFDAIPGPLGLASASLEGKVALVTGAGRGIGREMALELGRRGAKVIVNYANSSESAQEVVNAIKKSGSDAAAIKANVSDVDQIVKLFDQAVKVWGKLNIVCSNSGVVSFGHVKDVTPEEFDRVFTINTRGQFFVAREAYKHLEVGGRLIMMGSITGQAKGVPKHAVYSGSKGAIETFVRCMAVDFGDKKITVNAVAPGGIKTDMYHAVCREYIPGGTELDDEAVDEYAATWSPLGRVGLPIDIARCVCFLASQDGEWVNGKVLGIDGHAMM	282
PvAYG1	ATGGCCCTTGAAGGCGGAAAGTTCTTCATCCAGGACAAGTTGGTCACCCCGGGTCCGCATCATGCCAGCTTCAAGGCTTTGTGGGAGACAAAGTGGCGCGAACCATGCACTCTTGGCCTATACCCATTCATGTTTGGCGCACTTCAAGACTTTGAGCCCGTTGTAAAAGACATCATCAAGAAAGACCTAAAGGAACCGTACAACTGGGATGAATATGCGTCATGCTTCTTTCCCAAAGCTCAAGAATTGGTGACTCGCGCCATAGCTGCGGAGAACTCCGGAGAGCGGGAGAAGGCATCAGAGCTTTATCTTCGAGCTTCTGCTGTGTATCGCATTGCTCGCTTTCCTGTTGTACGATCGGAAAATCAGCTACATGCCTGGGATGCTGGCAAGGAGGCG…	1260	MALEGGKFFIQDKLVTPGPHHASFKALWETKWREPCTLGLYPFMFGALQDFEPVVKDIIKKDLKEPYNWDEYASCFFPKAQELVTRAIAAENSGEREKASELYLRASAVYRIARFPVVRSENQLHAWDAGKEAARKGLELHQYPMVQVDIPHTRAQQDDGKVLPGFYHIPEHASSRNKVPIIVIFTGLDGYRTELAVWKEGFRQVGCATLVVEIPGTGDNPAAPSDPTSPDRLWSSMFDWIEKQEGIDQQKIVNWGFSTGGYYSIRLAHTHAHKVKGAVAHGGGCHFMFDPFWLDHADYLEYPFDLSHSLCHKYGYGEDFERFKKEASGKFSLLEDGTLQKDCTRLLLVNGVGDEIFPVDDYYLCLLHGMAKEARFVPGKKHMGEPESFNVILRWISDL…	419
PvAREA	ATGAATCCTTCTGCGACAGAACACGACTACCGCTTTCCGCGAAGGCCATTTGAGCCTGCGGCCGGGTCCGAGGCGGATCGCTCAGCATCGGCTTATAATAATACTGGAATCAGCGGCTCGAATACCGCAACTGACAGCAGTCCCGGCGACCTGCGGTTACAGGAGCTCAACCTGGACTTGTCCAACAACAACAGCAGCGGCGACATTGCGCATCGTGACCTGCTAGACTCTTCAGCATTTCCCAACTGGCCAGCGAGCGCCACTGCCTCAAAGAAGGAAAATATCGATCAGATGCAGCAGGACGACCCGCTAGCGACACAGATTTGGCGATTCTTTAGCAAAACCAAGCAAAACCTGCCCAGCCAGGAGCGCATGGAAAATCTCACCTGGCGCATGATG…	2856	MNPSATEHDYRFPRRPFEPAAGSEADRSASAYNNTGISGSNTATDSSPGDLRLQELNLDLSNNNSSGDIAHRDLLDSSAFPNWPASATASKKENIDQMQQDDPLATQIWRFFSKTKQNLPSQERMENLTWRMMHMKLRKQQQQQKEEEERAKEMARQKASKEGAAGNAPSGIAQLRQNSDQNIAQSDPMNLDDFIFSENISTPAGLPLDPASPELLKLSEDKAAHATAAAIPIKSRKVSPQQHFVPQSVPVPPHRGHEDEFGYVNRHHRKTSIDDRRTRNLKRPANFSPQVGNLASGDIDVDADVHEYSLDHSHPSGVANAPHQPFSLDNFQMEHDPIITSAGPFQQNFSFSPSTSPMVTHNSFQNMYNSSSLAQGSMNAHDFYSPPASTYQSTATTPH…	951
PvAREB	ATGGAGGATGGCAAGGAGGGCTTGGCGGCGCCGCTGCCAACCCTCGAGCCTATTTCTCGGCCCAGTTCGACTGCGACGACAGCATCAGAGGCGATAGCTCAGCTCCCCAGTATACAGGCTCTTGCCAGTGGTACTTCTACCACGACAAGCTCGCCCCAATCAAGACCAAGCAACCCTCCGACCGTGATGGCCTCTGCAGGGCAAATGCCTACGACGCCTTCGGCTGCCGTAGGGGCCAACTCGTCGCCGCACGCGACAGTGCCAACAGCGACTGGTGGTTTGCCTGTCTGCCAGAACTGCCAGACCAGCACAACGCCGCTATGGCGTCGCGACGAGATGGGTTCCGTTCTTTGCAACGCCTGCGGTCTGTTCCTCAAGCTGCACGGTCGCCCGAGACCC…	1257	MEDGKEGLAAPLPTLEPISRPSSTATTASEAIAQLPSIQALASGTSTTTSSPQSRPSNPPTVMASAGQMPTTPSAAVGANSSPHATVPTATGGLPVCQNCQTSTTPLWRRDEMGSVLCNACGLFLKLHGRPRPISLKTDVIKSRNRVKTVRPDMQMKKKSLPATAVDPNGLNMHAHDAATAAALAAVRRTSQHKLNGHPDDSPVSRTGTPAMYDPNLAMYTNGVDGHQYQSPGLPQYALPDGASNGHDASAANGDAHDGVTETREQLIATNSSLKTRVSELEVINELYRGRLTQLETDSQNADNFRHQAEEAMKAEAHERQIREDSQRKQDETQRQLDDSHRRENIFKRRLDEMEQELKDAQDKIKQLEETAAVAAIAAAAAAEADADAERPAKKPRLE…	418
PvATG1	ATGGCGGACCGTCATTCATCATCGTCCTCGCGACGAACGAGGACTGGCGACGGCGCCGTTGGCCAGTTTATCATTGGTTCAGAGATTGGCAAAGGTAGCTTTGCGCAGGTCTACCTAGGCAGACATCAGACCTCGGGCGCTGCAGTCGCCATCAAGTCCGTCGACCTCGGCCGTCTGAACAAGAAACTCAAAGACAATCTGTACAGCGAAATTAATATTCTAAAGAAGCTGCGACATCCCCACATCGTTGCCCTCCATGACTGCCTCGAGTCGACGACACATATCAATCTGATTATGGAATACTGCGAGCTGGGCGATCTCTCATTATTCATCAAGAAGAGAGAAAAGCTGCTGACGCATCCGGCCACGTGCGACATGGCACGCAAGTATCCCAGTGTC…	2862	MADRHSSSSSRRTRTGDGAVGQFIIGSEIGKGSFAQVYLGRHQTSGAAVAIKSVDLGRLNKKLKDNLYSEINILKKLRHPHIVALHDCLESTTHINLIMEYCELGDLSLFIKKREKLLTHPATCDMARKYPSVPNAGLNEVVIRHFLKQLSSALQFLRASSLVHRDVKPQNLLLLPSVQYREGNGEARPVLSASRDSLIPVVGLESLPMLKLADFGFARVLPATSMAETLCGSPLYMAPEILRYERYDAKADLWSVGTVLYEMVSGRPPFRASNHVELLRKIELANDQIRFSRDCQVSSEMKTLIRSLLKFKSTARISFENFFNDPVVTEEIPGLVEDDLPKIERSLSKKETRVASKTDEPRSTPRRMSFRRQFRTESDAAQDGGPSSPRERPLRSSPL…	953
PvATG2	ATGGCGTCCATCTTTGGCTCCTTCGGGAGCTCCAACATGTCCAAGCGCCTGTTGCGATACGCCCTCTCTAGGCTCGAGTTCCTCGATACCGATGCCCTGGACGTTGACAAGTTGGACTTGGAATGGGGCAGGAACAATGTTCTCACCTTTCAAGATGTGGGCATTAAGCTGGAGAAACTAGAACATTTGCTCCAGCTCCCAGCATCGTTCAAGCTACAGAAAGCTAAAGTCCTAAAACTCCGCGTTACGATACCGTCCGCCATATACTCCAGTCCCATAGTCGTCGATGTCGATGGTGTACAAGTGAAGCTGAGAGTGGCCACAGAGGATTCACAGCGGGATGAGCAGGCGCGCGGCCGAGGTAGAAAGTCCAAGTCCCGGTCGGAAGAAGATGAACTT…	6210	MASIFGSFGSSNMSKRLLRYALSRLEFLDTDALDVDKLDLEWGRNNVLTFQDVGIKLEKLEHLLQLPASFKLQKAKVLKLRVTIPSAIYSSPIVVDVDGVQVKLRVATEDSQRDEQARGRGRKSKSRSEEDELVPPAIDLAQSFLDTEPSKEKAELQAALNAESHDLAASIASASEDGSDDDSHIGTGQPLSLPVFLADFLQGIVDRTQVSIRGVVFELDVEVPVEVHSTVPELVTLQLAVDDLNVEGVTTQLASEDSATAEYREGKRRISLNRIRASLISEANVFSTLARTPSVLSSMPSSMPSSVAAGSPVIPARQTLDEEEDDPLSRSIYGPLDESTDLSQSQYFPMMDSEDAFNIPYEFNSSQDDDPAQEDTRSAPSTPRALAPQSSPPLGSPRH…	2069
PvATG3	ATGAACTACTTGTACTCGACCGTCAACCAGATACGGGACAAGTACACACCCGTGTCTCACACCTCGACCTTCCGCAAGACGGGCCAAATCACCCCAGAGGAGTTCGTTGCTGCCGGCGACTATCTAGTCTTCAAGTTCCCGACCTGGCAATGGGCTGCTGCCGATAACGAGTCCAAGCGCGCCTCGCACTTGCCCGCTGACAAGCAATACCTGGTCACACGAAATGTGCCATGCCATCGGAGGCTCGACGACGATTTCGCTGGCGACGCAGGCCATGAGGAGGCCGTGGTGGGCGAGGGCGACGACTTCAAGCTGAAGGGCCAGGGCGACGATGACGATGGATGGCTGCGCACCGGTGGACTTAGCAGCTCCCAGCCTCTCAAGGCCAAGGACGTGCGC…	1044	MNYLYSTVNQIRDKYTPVSHTSTFRKTGQITPEEFVAAGDYLVFKFPTWQWAAADNESKRASHLPADKQYLVTRNVPCHRRLDDDFAGDAGHEEAVVGEGDDFKLKGQGDDDDGWLRTGGLSSSQPLKAKDVRTVDDAGNVGLIEEEDEIPDMEDEDDDDEAIIRDSDAQKKTAARRTYNLYIMYSPYYRTPRLYLSGYTGGQPLAPQSMMEDIVGDYKDKTVTLEDFPFFANAVKMASVHPCKHASVMKTLLDRADAALKIRRDKLKAGKNVGHDAGMEGLVDEINKLDVRSAEAAAAESGSNDEWEEVEAEEQDVAIRVDQYLVVFLKFMASVTPGIEHDFTMGV	347
PvATG4	ATGGACGCCACTTTGGACGTGGGTCGGCGGATCGTGCAGATGCTCTGGGACCCCGAGCCGACCAACGATATCGTCAAAGATCAGCCCGTATGGTGTCTAGGCGCGTCCTACCGTCTAAACAACAGCAACACCCACAAGACCATCGAAGCTACATTGCATCCGACTACTGCTACCGCTGCCGCTGCCGCTGCCGAGAACAACTCCTCCGCCGCGAACAATGAGATCAACAACAGCAACAATAACAGCATCGACAACTCGTCTCCTGCCACCAAACCCGCAAAACTGCCAGAGACACCAACAGACTCCATCCCTAGCAGCCTCGACTCGTCACTTGCGTATGAAGATGCCCCGAGGGACGGCGGTTGGCCGCCCGCCTTTTTAGACGACTTTGAGTCACGC…	1386	MDATLDVGRRIVQMLWDPEPTNDIVKDQPVWCLGASYRLNNSNTHKTIEATLHPTTATAAAAAAENNSSAANNEINNSNNNSIDNSSPATKPAKLPETPTDSIPSSLDSSLAYEDAPRDGGWPPAFLDDFESRVWMTYRSEFEPIAKSHDPKALAALSFSMRIKTQLSDQAGFSSDSGWGCMIRSGQSLLANAMLMEKLGRGWRRGTEAEQEKKLLSLFADDPRAPYSIHKFVDHGAVACGKYPGEWFGPSATARCIQALTNANEPHLRVYSTGDGPDVYEDNFMKIAMPDGETFHPTVILVGTRLGIDKITPVYWEALIASLQMPQSIGIAGGRPSSSHYFIGVQGLYFFYLDPHFTRPALPYHENAADYTSDEVETCHTRKLRRLHIKEMDPSMLIG…	461
PvATG5	ATGAGCGGCGGTAGCAGCGGCGACGGTGATCGCTCAATCCCCGAGACCCTCTGGGACCTGCACGTCCCGCTCTACATCACCCACACCTCTCTCCCCAACACGCCCTTTGTCACCACGGTCCCACGCTTCAGCTATCTGGCCTTGCTGCTTCCACGCCTGACCTCCTACTTTGGCCTGCCCTGCTCCAGTTTTCACCACGAGCATGTGCTGCTCAGGAACCTTGCCGTTGGCCTGCTTGTCGACCTGTATTCGCCCGCGCTGCCTTGGCGGTTGACCGTGGGCGATGGTACCAGCTGGGATATCGGAGACACTTTTCTCAACAGTGCCAAAGAGGCAGACTTTGTGCGGAACGGCAATGCACAGCAGATCATGTCACTCTCCAAGGAGCATACCACAGCA…	798	MSGGSSGDGDRSIPETLWDLHVPLYITHTSLPNTPFVTTVPRFSYLALLLPRLTSYFGLPCSSFHHEHVLLRNLAVGLLVDLYSPALPWRLTVGDGTSWDIGDTFLNSAKEADFVRNGNAQQIMSLSKEHTTALWNAVRDNDYMSFAKVNSRLLNTSRKLRNVPIRVYIPQSPSTDGSGPASGAGSFKVVQSLVNARVNDRTPQTLGVALRALLPMLFPSSRDPVLANVVLHGAPVPFSAPLEELMRDAAYPDGWICLVIVPTDV	265
PvATG6	ATGTATTGCCAAAAGTGTCGCAACCCCCTCAAGCTCGACAACTCGTTGTCTGAACTGAACCCAGCAGCGTACGCTCTATTAGTAGGCGCGTCCTCGCAACAACAGCAAAAGTCTCAGCCTGTGCTACCGCCTCAATACCCGCAACATGAGGAGAGAAGGGGCCTTTACGATAAGATCGCTAGGAATGCGCCCACCGCCATGTTCAGGCGGCAGGGGAATACGCAGCGTCCTGAGAATTCATTCGTCTTCCTTACCGACTCCCAAGTAGGACCTCCCCGACTACCAAACCAGAGAGAGCAGCCTGTTCCGCGACCGCCACGACGTGGGTCCTCCTTGAACGAGGCCGATGGCAAGGATGGCAAGCCAGCGCAGCTTCACGAATCCGAGCGCATCAATAAA…	1500	MYCQKCRNPLKLDNSLSELNPAAYALLVGASSQQQQKSQPVLPPQYPQHEERRGLYDKIARNAPTAMFRRQGNTQRPENSFVFLTDSQVGPPRLPNQREQPVPRPPRRGSSLNEADGKDGKPAQLHESERINKLFEILSSRSDIDHPVCVECTEMLTDGLQKKLDGAIKERNLYADFLKQQQADMPTEEEVSASQTALEKAQKDEQDAFDSLLELEKQREALDIEMAALEEESRALDAQEEQFWRGRNAFSAKLSEFQNERDSINSRFDHDSQQLIKLQRANVYNDTFSIHHDGHFATINGLRLGRLSTIPVDWPEINAAWGQSLLLVVTVADKLGYKFENYEPLPMGSTSKIIRYDHASPSSSRLGSHRSGPPPAPKKHVLELFSSGDMPLNLLWHRK…	499
PvATG7	ATGGCCGCAGCTTCTGGGTCGGCGGCCGCAAAGGACGGCGTCGCTCTCAAGTTTGCGACTTTTTCATCCGAGATTGAGCTACCATTCTACTCGGCCCTCTTTTCGTCGAAACTCGAGCATGATAAGCTGAGCGACTCGGCGCGGCCAGTCCTGGGACTGTACGAACCAAGACCTGGCGTTGCACCCGACGATTCGGTCAAGATGCAGGTTCTTGGTAGTGCTCTGACTAGTCATCATGTCCCAGCTGGTACCGTCCGAGCAGAAGGCATCATCCGAAACCTCAACACATTGGATGCGTTTAAGAGTGTGGATAAGGCCGAGGTCATTCACAATGCTGCAAGACAGATATGGGACGCCATCAAGGATGGGACCATCTACTCAGTCCCGTCGCTACTGGCT…	2127	MAAASGSAAAKDGVALKFATFSSEIELPFYSALFSSKLEHDKLSDSARPVLGLYEPRPGVAPDDSVKMQVLGSALTSHHVPAGTVRAEGIIRNLNTLDAFKSVDKAEVIHNAARQIWDAIKDGTIYSVPSLLASYVILSYADLKKYRMTYWFCFPTLPSDPQWKRTGAIGRFTADESTALVDRVGTWRYSVDNREYGFFLAKKVRGKDAEALRSSLDNPDEENIGFKWEVASLRDFETGFFTGIPEEDRYVAFVDSSNYEEHPAWPLRNLLVLVRQRFHLSKVQILCYRETQSRRHEARSLVLPLAMDKVESMDTADMPKPTGWERNPAGKIAPRSVSLAESMDPTRIADQSVDLNLKLMKWRISPELNLDIIKDTKCLLLGAGTLGSYVSRNLMGWGV…	708
PvATG8	ATGCGATCCAAGTTCAAGGACGAGCACCCCTTCGAGAAGCGCAAGGCCGAGGCCGAGCGAATCCGACAGAAGTACGCCGACCGCATTCCGGTTATTTGCGAAAAGGTCGAGAAGTCCGACATTGCCACCATTGATAAGAAGAAGTATCTTGTCCCCGCAGATCTCACTGTCGGCCAGTTCGTCTACGTTATCCGGAAGCGCATCAAGCTGTCTCCGGAAAAGGCCATCTTCATCTTTGTCGATGAGGTTCTGCCCCCAACGGCTGCTCTCATGAGCAGCATCTACGAGGAACACAAGGACGAGGATGGTTTCCTCTACATCACGTACTCGGGCGAGAACACTTTTGGCGAGTCCGCTTAA	360	MRSKFKDEHPFEKRKAEAERIRQKYADRIPVICEKVEKSDIATIDKKKYLVPADLTVGQFVYVIRKRIKLSPEKAIFIFVDEVLPPTAALMSSIYEEHKDEDGFLYITYSGENTFGESA	119
PvATG9	ATGGCTGGCAATCTCTTCTCTCGCTTCGTGCCTGGAAAGGATGACGGACCGTACTATGAACAACTTGGGCACGGCCAAGACGTCGATATAGAAAATCAAGCCGGCCTTGCTTTAGATGATGAGAACCTCGCCCACCAGTTTCACGACGATGATCTGCAAAGCGCTGCAGGACTGGCTATTGATGACAGCCAAATGTCCGTCGGCAGCGCTGTCAACCCGCCTCGTAACAGCCGCCGCTCGCAACCCCGGCGGGCTGCACATGAGCCAAGCTCCAGATGGTTGGCTCCCGACGACGATGGTGACAATGAAGTACCGGCTTCACTGCTCGTCGAGCCTGATGCAGCCCCGGCTGCCGCTCATGCCACCTCACCGCCGACTGGTGCTCGGCCTTCGACTCGG…	2760	MAGNLFSRFVPGKDDGPYYEQLGHGQDVDIENQAGLALDDENLAHQFHDDDLQSAAGLAIDDSQMSVGSAVNPPRNSRRSQPRRAAHEPSSRWLAPDDDGDNEVPASLLVEPDAAPAAAHATSPPTGARPSTRTTSIPGPSSRRTQAQWETTQAQQRLHRDDDYGQAGTGGPANAPTRRLGLNISPREKAMFRWANVSNLDAFTREVYNYYQGAGFWCILLDNFLHIVKVIFMASLLTLLTQCVDYRTIRHSKSLSEVMIPKCTKNMWGLWNFGLWCTTLYVVGKIIQYFLELPRLMHLRDFYVYLLEIPEVDMQTVSWQDVVSRITGLRDQNVKTASNITATQRRFLSKQLGRHMVGSSKERLDAHDIANRIMRKENYIIALFNKDILDLTAPIPFVR…	919
PvATG10	ATGAACCGCTCTACATATCACAGCTACCCTTTCCTTAGCATAGAAGAATTTGCCGAAGTCTGTCACCACCTCGACAACAAGTACTGTCAGGCTACCTTGGGTCCCGTCCGCAAACAATGGAAACTCCGGGTCCATAGGGCACTTGATATGGTATTCGGCTCCGACTCGGGGTTCACTACGTTTGTGCAGATCACGCGACCTCTTGAAGAAACTGGAGACCTTGACGAGCTGGAATCATACTTGGATAGTTTTTCCATCGGCGCAAATTCTCGAGATGATCCAAACCTGTCCATGCAGGTAGATGAAGACCTCGAAGAACTGGTCAAGGAGCCATCACGGCCCAGGATTGGTCATGTCAAATATGAAATCCATCTCCACCCAACCTACCAGGCGCCATGT…	699	MNRSTYHSYPFLSIEEFAEVCHHLDNKYCQATLGPVRKQWKLRVHRALDMVFGSDSGFTTFVQITRPLEETGDLDELESYLDSFSIGANSRDDPNLSMQVDEDLEELVKEPSRPRIGHVKYEIHLHPTYQAPCLWFSIHDLPADEAAFDVDTVFRRLVPDQFKSALRGAGPIGGISADHHPITGVPAFFVHPCLLGDAMAGFDCAKEDYLMVWLGLVGGCVGLWVPKEMALS	232
PvATG11	ATGGCGACGCCGACGCAGGTGTTGATAGCCCATACGGGCCAGCGCCTGCAGGTGGACATCTCGCAGTTCGCAACTTTGGATGATTTTAAAGCCTGGGTGGCTCGACCGAGCTCCATCTCGCCACAAAACATCATCGCTCTCACGCCGCAAGGCAAGACAGTCAAGATCCAGACTATACACTTTGAGAAGGAAATATACATTTACGATGTCCGGATAACGCAAGCCTCGCCCGCCGGCACACCAGCACATCTCGCCCCCGAGGAGCCCCTTCCAAAACAATACACTGTAACGAATGCGCCCGACTACATCGAGAACACCCACTCGCTCCAGTCATGGCAGGACTTGTTCAAGAGCCGCCGGGACTGGGCCTTCAAGATTATAGAAGACTGCGCGGCCATG…	4422	MATPTQVLIAHTGQRLQVDISQFATLDDFKAWVARPSSISPQNIIALTPQGKTVKIQTIHFEKEIYIYDVRITQASPAGTPAHLAPEEPLPKQYTVTNAPDYIENTHSLQSWQDLFKSRRDWAFKIIEDCAAMTEAFQARHEEMKVMTKCLDAAVANLDSAVRPQEPKFNELKKWVAPVQEEYGTLATNWEQYMDLARSITISAAMVRFMTGRDLRKSRQATLEDLIDLDTAHKAGKLAASSLRKFNNKVTELDKMADRMFGGCDDLFQDIDKVMSRSILTHGDDAAQLLDDIEAVAKKIDTDYQATLAYSSSTRDVLQASKTAAHHTERLLPSIQNRAREMDELLRDATQARNDLSVESLSLMRTIAEITSFLHNLKTMMGVLNQGEEEMTTFDYLRL…	1473
PvATG12	ATGGAATACCCAGACGTACCAACGCGCGATTCGTCGCCCTCACCCCCGCCATCCCCGACCCTGGACCGCCCGGCCTCGCCCGAGCTGCCGCTGACCATGACGGCGTCGGCCATCCTCACCAGCCTGCCGCAGGACGCGAGCTCGGCCCTGGCCAGCGCGGGCGACTTCCAGCAGGAAAAGGTCGTGGTCCGCTTCAAGGCCGTGGGCTCGGCCCCGCAGCTCCAGCGCGAGGTGCGCAAGATCAGCGCCGCCCAAAAGTTCGAGGCCGTCGTGTCGCACCTGCGCAAGGCCCTCCGCGTCGCTCCCCACGAGGGACTGTTTCTGTACGTCAATAGCGCCTTTGCTCCGGCGCTTGATGAGGTCGTTGGCAACTTGCATCGGTGCTTCAAAGACTCAAAT…	444	MEYPDVPTRDSSPSPPPSPTLDRPASPELPLTMTASAILTSLPQDASSALASAGDFQQEKVVVRFKAVGSAPQLQREVRKISAAQKFEAVVSHLRKALRVAPHEGLFLYVNSAFAPALDEVVGNLHRCFKDSNDQLIVVYSMTPAFG	147
PvATG13	ATGCATCAAACTCCCCGTATCGGACCTCGCTCCTCATCGCCTGCTACTTCGCCCACCACAAATCCTTCAAGAACAAACAATCCAAGGGAAGCTGCTCGGCCGGGCGGTCACTTACGAACAGGTTCCGAGGCGAGCTCTGGGCCCGAGGCTGCTGGCACTATGCGACCCCCCAGGGAAGATGCGCCTGGCGCAGGTCCCAGTTCGGACTCGGTCAGGAAGCTGGACCAGATCTTACAGAACATTTTCGCCAAGGCTGGCACTCTGATATTACAAGAGCGCATGCAGGTGTCACCCATGTTAGTTGCTGGAACCAGAGAGAAGAGGATAAGCAAATGGTTCCAATTAGACACCGATGAAATCGAGGACTTTCGGGAAGAGTTTAGAACATGGAAACATTGT…	2826	MHQTPRIGPRSSSPATSPTTNPSRTNNPREAARPGGHLRTGSEASSGPEAAGTMRPPREDAPGAGPSSDSVRKLDQILQNIFAKAGTLILQERMQVSPMLVAGTREKRISKWFQLDTDEIEDFREEFRTWKHCGGIDNLPPPLIIETYLDTSRLKSGQSLIITDENGKRWDAIEAMNTSDLSSDSSVSGSSAGGRSKKTNSHIVLERWRIELKPSSNDPEDFGLLLPTVYKKAIIFIRSLYTTTGILPAWKLARTSKSKMQHPALQVKCRVLTTENRPYGFDALRSPLYDGRGDVSTDYIFGLLEVPVGRFYASVSYRNNCDFKVVETESLLSSRIGLAISDDIFKPSLPRREPGRRDTAAEIGSLPYHRHETDITENQQRYGSLSTFHGEGPHGTSPI…	941
PvATG14	ATGGATGCCCGTAACTCGTTGTACGAAGGCCGGATTGCCCTTGCCAGCACCATGATAGAGTTGGATGAGCTGGAACAGCGGGGATCCGCTCTAGTGGCTGCCTGCGAGTCGAGCAACACGACCAGCGCATCAGATCGTACACGCTCCTACGTCGAAGACTGTAATGCAAAACGACAGAAGGCTGTAAATCGGACGACAGAGATCATCTCAACAGCTGAAAAGTTGCAGCAGGATATCGACCAGGCCAGGAAGGAGATCGAGCAGCGCAAAGCTGCGATAGCACGGCGCAAGGCTGATCTTGCTTCTGCTTCGCAAGGCATCGCCGCGAGACGAAACCGAGAGTTTGAAGAGACCAAGACGTCCATTAGAAAGCTCAAATACCACTGGGATCGAGAACAC…	1494	MDARNSLYEGRIALASTMIELDELEQRGSALVAACESSNTTSASDRTRSYVEDCNAKRQKAVNRTTEIISTAEKLQQDIDQARKEIEQRKAAIARRKADLASASQGIAARRNREFEETKTSIRKLKYHWDREHEATAQYRAALCAEVAKLYRLQRIKKGNPNRYEYKIGGLEVVDLHLLNSMHPEHISASLGHIAHLLWLASHYLAVRLPAEITLPHNDYPRPTIFSLASSYHHGQVGFPGTSPLPIDSLDRQYGHIPHPRPLFLDKPLSSFSKEESNNYNSFLEGVCLLAYDIVWLCRTQGIPVGDNSNSFEDFTYMGRNLYNLLNGSSLQRNQPGQPIIDANTPSPTHASDGATAENDDITKSAPKMGLWSHGAAHTSLNSTTGQDFTRSFKLPTPI…	497
PvATG15	ATGATGCGACGCAAGAGACCGACCTCCTGCAACTCTGCCGGCAGAGTAACCGCCGCCCAGCTATTATTATCATTTCTCGCCCTCTCGTCATCTACTGTTGTCGCATACGATCAGAATGCGCAAATCGTCCTCGATGGCTCGCCGATAATAACACCTCCCATGATTGCTGAGCCGCCGCAGCCTGCCGAGCACACATTCACGCTACGTCATATCCTCCATCATGGAACCTACCGGCACCCCGGCCTGCATCGCCGCCGTGATGTGACAGAACCACAAGCTCAAGTATGGCTTGCGGCAGAAGATGGATTCGACGCCGAGGAAATGCCACCTCTCAAGGCCAAGAGCTCCGCCCACAAGATTGAACGATTAGTCGATAGGCGGCCCATGGTGGTAGACCCC…	1749	MMRRKRPTSCNSAGRVTAAQLLLSFLALSSSTVVAYDQNAQIVLDGSPIITPPMIAEPPQPAEHTFTLRHILHHGTYRHPGLHRRRDVTEPQAQVWLAAEDGFDAEEMPPLKAKSSAHKIERLVDRRPMVVDPMVAEARQRGYVLAGMPNAWTVDDVSGPDVTDKGTVLTMALIASDAYVEKPSLPDWDEVGEPFNRSADFGWETDGLRGHIFADENNSTIVIGLKGTSAAVFDGEGTTTNDKENDNLFFSCCCAQQGQWSWHQVCDCATGTYSCNNTCVTQALRGENRYYQAARELYSNVTEMYPESNVWVVGHSLGGAVSSLLGLTYGLPVVTFEAVPEALAAGRLGLPVPPHGDPQYPQTRDYTGTYHFGHTADPVYIGTCNGATASCSFAGYAME…	582
PvATG16	ATGCCAGACTGGCGATCTCAGTACCTCGCCAACTTGCACGAGGCCGAGTTTCGCAATCCGATCAATAAGGATATAGTCTCAGCCTGCTCCCAACTAGCAGACCGCGTCGCGGCCCTCGAGGCCGAAAAGGCAGTATTGCAGCAAAGGGTTCAACAACAGCCCCCATCCGTCATCACCGACGATGCCACCGGGCCCGGTAACGCCACCACCACCGCTGCTGCCTCGGACACGGTGGCGACAGCGCAGCTCCGGCTCGACCTAGCCGAGGCGCTGCGGTCCCGGGGCCAGCTGCAAGCGAAGCAGCGCGCGGCCGAGGCGGAGCTCGCGGCGCTGCGGACCAAGACCAAGGGCGACGACAAGAAGCTGCGCGAGCTGGCGGCCGAGCGCAACGGCCTCGCC…	630	MPDWRSQYLANLHEAEFRNPINKDIVSACSQLADRVAALEAEKAVLQQRVQQQPPSVITDDATGPGNATTTAAASDTVATAQLRLDLAEALRSRGQLQAKQRAAEAELAALRTKTKGDDKKLRELAAERNGLAAKLRDRTEELVGKNRLLKDVQDDNLTLNIQLDVRESECKKIKAENKELVDRWMKKMEKEAEAMNLANEPQANGRKR	209
PvATG17	ATGGCTTCTCGAGGGTCCTCAGCCTCGTCTTCACCCCAACACTCCCGTCCGTCCTCCCATCATGGCCATCTCGACGATTCGTACGATATCCCCGTCGAGACTCTTGTCCAGCATCTTTTAGAAGCAAAGAAATCGCTATCGTCCATGGCCCATGTTCTGCGAGCCAATGAGATTGTAACTGCAGCTCGTCAGGCCCATGAAGAGTCGGTGATCCTAGGAGCTCAAGCCCAGTTCTTGCGACGAGGTATAAACGACCAAATCAGATTGTTGTTGAGAGCTCGTCGTAGTATGACGAAGACCTACGACAGCGGAAAGCGAGGATTCAAACGAGTGATCAAGAGCCTCGATGCCGCCAATGAACAACTAGAGACCACTATGGACGTACTGCGCGACCGAATT…	1524	MASRGSSASSSPQHSRPSSHHGHLDDSYDIPVETLVQHLLEAKKSLSSMAHVLRANEIVTAARQAHEESVILGAQAQFLRRGINDQIRLLLRARRSMTKTYDSGKRGFKRVIKSLDAANEQLETTMDVLRDRIVESAFRPKGEERRNLLDFVDVAQVETMTSTLKDNIVALQSTQTSFDGDLLRFDDDLRALNKTIAAAPSPPSPSASNSHQPVPHLLASLMESSHDMAELLASLTKHFDLCVTAVRTTEGGAALARRKAAEASQAQGDGNNVSISGVIAEQESHMAELDPISPEERMEMLQVVAQDASEVADVVQEIYERLANMEDEYHYLVEQTNQVAAAYTTTLDAFQVLEDISTRFRSYIAAETEFRDRWVAEHESIGAKMDEMEQLRLFYENYA…	507
PvATG18	ATGGCGGCCTCAACTCCCACCTCGCTCAACTTCATCACCTTCAATCAAGATCACAGCTGCCTGGCCGTAGGCACAGCCAAGGGCTTTCGTATCTACCATACCGATCCCTTTTCCAAGATCTTCAGTAGCGACGATGGCAGCGTCTCCATTATCGAGATGCTCTTCAGCACCTCTCTCGTTGCCCTCATCCTCTCGCCCCGCCACTTGATCATACAGAACACCAAGCGCGCCTCCGTTATTTGCGAGCTCACTTTTCCCTCGGCCGTACTGGCCGTTCGCCTGAACCGGAAGCGACTGGCTGTCGTTCTCGAGGATGAGATCTATCTATACGACATTCAAAACATGTCCCTCTTGACCAGTATACCCACCTCGCCCAACCCCGGTGCCATCGCAGCTCTC…	1305	MAASTPTSLNFITFNQDHSCLAVGTAKGFRIYHTDPFSKIFSSDDGSVSIIEMLFSTSLVALILSPRHLIIQNTKRASVICELTFPSAVLAVRLNRKRLAVVLEDEIYLYDIQNMSLLTSIPTSPNPGAIAALSPSSENCYLAYPLPKPREDGGPSDRRPAHAPPASLYTPVTSGDVLIYDTLTLKAVNVIEAHKSPLSCVALNHEGNLLATASETGTIIRVFSVPRGQKLFQFRRGTYPSTISSMSFNATSSLLCVSSTTDTIHIFRLQQPGPPSTAAATEASRDRMTRGRSYDSGNDSPSSNTGSPRSDVAEAATNPPSVSRRQSGSFSSMLRRSSQIMGSRVAGVVGNYLPQTFNEMWEPQRDFAHIKIPRPPQKQGAGRSVVAMSSSSPQVMVVT…	434
PvATG20	ATGTGGAACGACGAGGAAGACAACAATCCGTACGGCACCAGCTTTGACCGTAGGGACTCTATAACTTCTTCCTCAGCCAATCCTACGTCTCCCATCTCACGAGAATACCCTCGATACGACGCACCACACACTCCCTCAACTACCAGTGAGGAAGCACCGCCTCAGCAACCTTTTGGTGGGCAGGAGTCCAGCGATGCCGACAGCGATGAAGAGTACGCCGCGCAAGCAAGAAGCCAGGTTCCTAGGAGGAAACCTGGTGGCTATGACAGTCGTATCGAGCAGATCCTCTATGAGAATCCAGACCTGCCCATCCTGATTACAGATGCTGGAAAGAGCTTGGAGAATGGAGGCAAATATATTGTTTACACTATTCGAACAGGAGACCTCGAGGTGCGCCGA…	1884	MWNDEEDNNPYGTSFDRRDSITSSSANPTSPISREYPRYDAPHTPSTTSEEAPPQQPFGGQESSDADSDEEYAAQARSQVPRRKPGGYDSRIEQILYENPDLPILITDAGKSLENGGKYIVYTIRTGDLEVRRRYSEFSSLRDALTRLHPTLIIPPIPEKHTMADYAANPTNAKQDQQIIDLRKRMLAVFLNRCRRMEQVRNDGVWWRFLDPNASWSEVLHTHPVASIPKQVLKAPPLDTANASAAHSYLPVPAASAKLRTGSSSGFDGSASVTGSQVVRRFPPDSHDLNEQELDPYFISFETSIKELEKLLAGPMEKVNRRTLNHLTSLATDLSDLGAKYNAFALSEPSQTLGAAIERIGQATDTSYIATEELAGSLGASFAEPMRENAQFASVVRSV…	627
PvATG21	ATGGCGGCCTCAACTCCCACCTCGCTCAACTTCATCACCTTCAATCAAGATCACAGCTGCCTGGCCGTAGGCACAGCCAAGGGCTTTCGTATCTACCATACCGATCCCTTTTCCAAGATCTTCAGTAGCGACGATGGCAGCGTCTCCATTATCGAGATGCTCTTCAGCACCTCTCTCGTTGCCCTCATCCTCTCGCCCCGCCACTTGATCATACAGAACACCAAGCGCGCCTCCGTTATTTGCGAGCTCACTTTTCCCTCGGCCGTACTGGCCGTTCGCCTGAACCGGAAGCGACTGGCTGTCGTTCTCGAGGATGAGATCTATCTATACGACATTCAAAACATGTCCCTCTTGACCAGTATACCCACCTCGCCCAACCCCGGTGCCATCGCAGCTCTC…	1305	MAASTPTSLNFITFNQDHSCLAVGTAKGFRIYHTDPFSKIFSSDDGSVSIIEMLFSTSLVALILSPRHLIIQNTKRASVICELTFPSAVLAVRLNRKRLAVVLEDEIYLYDIQNMSLLTSIPTSPNPGAIAALSPSSENCYLAYPLPKPREDGGPSDRRPAHAPPASLYTPVTSGDVLIYDTLTLKAVNVIEAHKSPLSCVALNHEGNLLATASETGTIIRVFSVPRGQKLFQFRRGTYPSTISSMSFNATSSLLCVSSTTDTIHIFRLQQPGPPSTAAATEASRDRMTRGRSYDSGNDSPSSNTGSPRSDVAEAATNPPSVSRRQSGSFSSMLRRSSQIMGSRVAGVVGNYLPQTFNEMWEPQRDFAHIKIPRPPQKQGAGRSVVAMSSSSPQVMVVT…	434
PvATG22	ATGGTACCGCGGAATGATGACCACCTAAGGCGACCGCCGCTCAATCACTTGTTGTCCATCCAAAGCACCGTGTCCAAACACTCGTACCGCTCGCACACCTCATCCTTTGAGGCCGACGATGAGTTCTCCTCAACGGACGACTCTTACTCAAGCAACGGTAGCATGACCCCACGCGCGAGTATCGACGAAGACGGGCGGTCGTCCGGTGCCTATCCGGGAGAAGACACCCGCCCCACGAGCAGGAAGGAGCTTAATGGCTTCTATGTTTACGGGTTCGCCGCTGAAGTTTACGTGATATGCGCTATCTCATCATTCATCCCCATCCTCCTCGAAAGTCTTGCCAGAGAAAATGGCGTCCTCCTGTCCGACCGACAAACGCCCTGCGGCGACAGCTCTGCT…	1959	MVPRNDDHLRRPPLNHLLSIQSTVSKHSYRSHTSSFEADDEFSSTDDSYSSNGSMTPRASIDEDGRSSGAYPGEDTRPTSRKELNGFYVYGFAAEVYVICAISSFIPILLESLARENGVLLSDRQTPCGDSSAKKGKAGDGQCIVEILGIEINTASFAMYTFSISVLLQAILVVSISCAADHGNYRKRLLLTFGWTGGICVMLYIFISKQVYVLGALLAIISNTSFGASFVLLNSFLPLLVRHHPRVQYAEGILHDETGSESHHEDHSVDEGRPLDHGDYVQLPTDDNSSEFHQLTRTSTKSELTSLELQLSTEISSKGIGIGYGAALFVQCVAIMILIAMKSSTWSQRVVLLFVGAWWALFTIPAAMWLRPRPGPPLPDLQTKGRWLWLSYTLYAWKN…	652
PvATG24	ATGGCGGTCATCGACCAGCATGACAACTTTTCCAATGTCTCGTGGCATAGCGACAGACACGATACTGCCGACTTGACTGCCTCTAGTTCGTCGAACCCCGTATTCGATGATTCTGAGCCCATCGGCGCACACCACCCAGAGATGGAGGAGGATCCAGAGCGGATAGACCCCGGCTTGTCCGGCGACATCCTCAATTGTACTGTCACAGAGCCGCGCAAGGAAAGCGATGGCACAAAAGATGCCTTTGTATCATACCTTGTTACAACTAATTCGTCATTCCCGTCTTTTCAGAAATCGCACTTCACTTCGCGCCGGCGCTTCACAGACTTTGTCTTCCTGTACAAGTCCTTGTCCAAGGACTACCCGGCATGTGCTGTGCCGCCGCTGCCCGACAAGCAG…	1398	MAVIDQHDNFSNVSWHSDRHDTADLTASSSSNPVFDDSEPIGAHHPEMEEDPERIDPGLSGDILNCTVTEPRKESDGTKDAFVSYLVTTNSSFPSFQKSHFTSRRRFTDFVFLYKSLSKDYPACAVPPLPDKQRMEYVRGDRFGPDFTHRRAFSLQRFLTRLGAHPILRRAPILHTFLESPDWNATMKSRSARGSVNVEPGSGGVFDNFADTFINAFTKVHKADKRFIEVRERADKLDDDLGHVEKVVARVVRREADLETDMRDLAEQFQKLITLEPGVESAVHAFAASVEDASTGLRRLKDHTDQDYLGSLRDMSAYSMALKNLLKAREQKQLDHEQLTEYLNKSTLERDGLASGYGSSGAGGFIRSKIEDVRGVDHEASRRERLRKLEIRIDELTTE…	465
PvATG26	ATGGCCCCTACACCCCCTGATGTCCGTCCCTCGAGCGAGGAGGCGACCAGGAGACGAGTGAACAAGAAACTACACAAGAAGCGTCGCGAAGAACACCAGCCAACAATGGAGCTTCCCGATCGGTTAAAAGAGACTGGGGATGAGGCTGATGAGGATGTGTTACCTCAGCAGGGCGGCCATCAAATGTTTATGAACATGAATCAATCAATATTTGGACTGATTGCGGCCGCCGGATCTACCGCTGACTTCAACGACCGGTTCGAAGAGCAGTATAGCGACGAGGACGAAGCTGGTGACCAAAAGCTCGAGACCAGAAAGGGCAAAGGAAAGGGACCAGAACGGGAAGATATAGCAACATCACAAATACTAAGAAAGGCTTCACCAGAGAAGACAGAGAAG…	4428	MAPTPPDVRPSSEEATRRRVNKKLHKKRREEHQPTMELPDRLKETGDEADEDVLPQQGGHQMFMNMNQSIFGLIAAAGSTADFNDRFEEQYSDEDEAGDQKLETRKGKGKGPEREDIATSQILRKASPEKTEKTDKKHRRRLSAQLLHSLPQLPRLTSKSKSRSSKLKSPPTEPNAGLNGADAHQDAFLQEARPSNLQSPNIEVTATDRDARAAPVMSRMLEARAEMAARPSFDLERLSSDLRRGGDAGENEDTELAVRLKEIFEFDQPEKVLEEYPCWLLQSVLLQGYMYITARHICFYAYLPKKAHEVAKSGYLSKSGKRNPKYNRYWFRLKGDVLGYYRDSSNLYFPSGQIDLRYAISANIVDKEKDGVHFSIVTEHRTYHFKADSAPSAKEWVKS…	1475
PvATG27	ATGAAGATTTCCCAGATACCCTCAGCAGTGGCCCTGCTGGCCTCTCCGACGGCAGGACTGCTCCTCAGTTGCGACAATATTGTGGCATCATCACGCAAATACGACTTCTCCAAACTTGGCGGACCGCATTCAGTGACCGTGAGCCATCAAGTTGGTCCCAACTTTCACAATACCACATTCACTACAGATATCTGCTACAACTTGAAACGCAAGTCCGATGTAGCCAAGGACGAGCAATGCCCACACAGCACACGCATTTGTGCCATTGAGCGCATCGTCGGCCAACACGGTGACACAAAGTTTGACGATTTCAACGAGGCCTGGCCTATTGCCGGCAATCTCCAGCAGTACGGCGGATATCCGCTCGATAATGAGGCCATCTACTTGCCCACAAGCGAT…	1050	MKISQIPSAVALLASPTAGLLLSCDNIVASSRKYDFSKLGGPHSVTVSHQVGPNFHNTTFTTDICYNLKRKSDVAKDEQCPHSTRICAIERIVGQHGDTKFDDFNEAWPIAGNLQQYGGYPLDNEAIYLPTSDSNSDAEKDGVRLIVKGGWHEMNGQKRQQRAIIEFICDADLEGTEGEWKPEDEYVPGDDDKEERSLTDALSYEAAEDGGDKSEKPVQLGYNNGTQALIFNSYGPLDSDTNIDVLRLTWNTKYACQKRDGNGGDEPAGDQPSSHWGFFTWIVILVFLGTAAYLIFGSWLNYNRYGARGWDLLPHGDTIRDIPYLMKDWTRRVLSTVQGSGSRGGYAAV	349
PvATG28	ATGACTTCAAGGTCCTCATATGTTCCGCGACTGTCCTTTGGCGCGAACAGCGGCTCGATGCTCGCAAACCATCGACAGCAGCGCAATCATTCCAACGAGTACGATCTTTCCGAGCTGTCGCCTCGTCCCTCTTCACCTCTTCTTTCGCCCGACCACGAACGCGATTTCGGCTTCGACGATCCTTACGCCCACAACGAACATGGATCCGCCACAAGATCGAGTAGAGGGAAAGGAAAGGCAAAGGCAGTGGCTTATGCAGATCAAGGCGAACAGTTCCCTCCCGTAAGCGTCGTCGATAGAATGCGCATGTACCGCGAGAGCCAAGCAGTTGCCAGCACCCGCGAACAGCGAAACTTGGACGAAGCCAGGCAAACGGGTAATGGACCTATGTGGCAACCA…	2238	MTSRSSYVPRLSFGANSGSMLANHRQQRNHSNEYDLSELSPRPSSPLLSPDHERDFGFDDPYAHNEHGSATRSSRGKGKAKAVAYADQGEQFPPVSVVDRMRMYRESQAVASTREQRNLDEARQTGNGPMWQPPRPVTYRDNDWTTHKVQRTSPHSDQDRPKNLGASFMGFLNASPATSEISPAEDVDNTFRTIQRRDKQIQKELQRLLDAQAEALDQGDAAAAPSSDGGDGGSDPYGTPRASSSPHRSRSLSSYGGSPAPAVIPVRQPKPKPMTIRQVRASIARSMAMLSDLKEEEDAYIASAVSSRKIALARANKLSNQHKAIAAELKALESTDPLRKELDGMNKEFSQICGNIDELEGKLRAMKHRKRVLEARMEEVRSERESGLSGYRGALREAE…	745
PvATG29	ATGGCCTCTTCAGATCCGACGTATACGGTTTTCATCCGATTACCATTTCCCCGGGGCAACTTTGTGGATCCTCCGCCGGTCAACTGGGACCCTTCAAAGGACGATGAACTCTGGAATATCGTGTCGAACGTCTCCAAGACGGACATAGACTGGAATGAAATCGCCTCGAGTTTCAATGTCAACGTCGATTTCCTCCTCCAACAAGCCGCCTTCCTCACCGAACGACACACATCGCAAGTTCGAGCTCAGCTTCGTAAAGCGGCGGCTGCAACGAAAGGATCTTCGGCCAGTTCTCCAGCACCAGGTGCTGATGCTGCATCCACTGGTGATGGACTCCAGCGCACGGGTTCAGCGGCTGGCCGACCGAGAGCACCCTCAGCTCTATCGTTGAGAAAAGAC…	1215	MASSDPTYTVFIRLPFPRGNFVDPPPVNWDPSKDDELWNIVSNVSKTDIDWNEIASSFNVNVDFLLQQAAFLTERHTSQVRAQLRKAAAATKGSSASSPAPGADAASTGDGLQRTGSAAGRPRAPSALSLRKDSPLPRTDGSTPGTPLRATPRPQAARKTSSNTGSVYATRNLGGSSKANVRSGDAQRRRLSSLPLSTTAATPEVETDPLSPGPADTSSPASSSDESSPAQSRIIRRPPISYDDDDDEEDDEPAFLPYRAQKETSTGGQHDLSATLRGNLPRKQPKQHGKIHLSQTSDSSASSTAPLPRGLSGGKAGLGSPLSPRRTQELAGRSPIGKGKGYSRDSDGTPSMGSSFSDLDDASVTQSALEEALASRIQDGGIGSRMSTISNVFRSRYLP…	404
PvATG32	ATGAAGTCGACATTGTCGACACTTTTAACGATACTTCTGGCGGTCTGCCAGGTAGGGCTGATTCTGGGTTCGCCGTCGCACTCGTCGTCTCAACAATATCTCAAGCCTCAGAATAGTCGTCCGCATCACAAGACTATATCCAACCACTTCTTCGCCACCCTCGAACGGTTATCCCGACTCGTCGATATCGCCTACTGTGTGGGAACTACCGGTCTGTCGCGGCCTTTTGAGTGCGCCTCGCGCTGCAAGGACTTCCCAACATTGCAGTTGGTCACGACATGGAACACTGGGGTCTTGATGAGCGATAGCTGCGGCTATATAGCAGTTGACCATGGCGCAAATCTGGGGTCCAAGCAAAGTATGGCGCCACATGGGAACGACAAGCAGGGTGCAATCATC…	1245	MKSTLSTLLTILLAVCQVGLILGSPSHSSSQQYLKPQNSRPHHKTISNHFFATLERLSRLVDIAYCVGTTGLSRPFECASRCKDFPTLQLVTTWNTGVLMSDSCGYIAVDHGANLGSKQSMAPHGNDKQGAIIIAFRGTYSITNTVVDLSTVPQEYVPYPSPEDGGESPPQEPEHRCHNCTVHMGFLASWTNAREDVLPTLKPLVSQYPNYPIYLIGHSLGGAVAALAALEMKVILGWHNITVTTFGEPRVGNGGFVRYLDTVFDLKDNETDPEDWTYRRLTHIDDPVPLLPLHDWGYRSHAGEIFISKPDLAPAPEDIWPCTGDYDPKCAAGSEGEAELSRAARDELLVLAAEEGEMRAEKRWGFPTKFKLWQLFFAHRDYFWRLGLCVPGGDPFDWG…	414
PvATG33	ATGGCGTCGAAGAAGGTGTCAATCCTCAAATTTGTCGGGACCGTCTCCCTCGGTCTCCTTACCGGTACAACATATACTCTCTCAACCTCCACGATTCCACAGCTGCTCGAACTCCCATCGGCTTCTAGCGCCTCAAAGGCATTCCGCTCCATTACCAGCACCGCCGCGACTCACCTCAACACGTTGACCGGTGTCGCTGGCTCCGCCTTTCTCCTTGCCTTTGCGCTGTCGCCGCGCGGCTATAGGCACCCGTACCTTATCTACACGTCCGTCTTCTGCTTCAGCACTCGCCTGACCGACTACTTTGCCCCGACCCTGTTTGGCGCCCCCGGCGACTTTTCGCAAAAGAGGGCCGCCCTGGCCAAGGCCCGCCGCGAAAAAGCTGCCGCCCGGCGCATG…	636	MASKKVSILKFVGTVSLGLLTGTTYTLSTSTIPQLLELPSASSASKAFRSITSTAATHLNTLTGVAGSAFLLAFALSPRGYRHPYLIYTSVFCFSTRLTDYFAPTLFGAPGDFSQKRAALAKARREKAAARRMEQSYEVLGVERESDNEGSSEDVFEEEINGEEVRSEVELFVKNHLVQTALAGVGFMMAVVGIWGDGVYDSFGETVVVAL	211
PvATG36	ATGTTGGTGATAACTGTGTTTTGGGCTGTCGCTGGAGTCGCCCTCGCCGACGTTCGCGCTCTATCATTAAAGCTTAATGCCGAGGAGATCACTACTGGGACGCCTCTCGACGGCTTCGTTAGCTATTCCATCGAATTCTCCTCGTTCCCAGATTTCGTCGGGAGCTCCGCAATACCGAACGACTTCTCAAACACACTCATCAATAATATCGGCTACTATCAAGGTTCGAACCCATATATTCGAGTGGGAGGGAATACTCAGGACTTTGCCATCTATGATGAGAACGAGACACTTCCTCTCCGTGGCGTTTACAATACCACGAGGTCTGCAGACTATCCCACCACAATCACTATAGGACCATCCTTCTTTGACCTGTATAATGTCTGGCCAAAGGTCAAG…	1617	MLVITVFWAVAGVALADVRALSLKLNAEEITTGTPLDGFVSYSIEFSSFPDFVGSSAIPNDFSNTLINNIGYYQGSNPYIRVGGNTQDFAIYDENETLPLRGVYNTTRSADYPTTITIGPSFFDLYNVWPKVKFSHGFNLGGNNDSRVYETLNQTVPLACKALSNGNFYRFEYGNEPDLYNGIIPTAQVRPASYNESDYVGEWLQGTRTINELVQQNCPNLMDNDTYGFMAPSFAGTNNSLNAPLAWSDGLDADADIRTFSSHNYISGANSLGVTLQGTLMNHTRTKQSVDAHVADYNAVNPGTSGAVPHIFGETNSLYQQGRPGLSNTFGAALWAVDFLLYSASVNIQRVHLHMGTNYRYQAWQPVTTNITSVGTKAPYYGGVAAAAFLGNLNVATVQ…	538
PvATG38	ATGAACGCCATTCAGCAAAAGTGCCGTCCGAAGCACCAAGTCCTCGTGCTGAAATGTTACCCGCGAACCACCAAGGGGGCCGTGGACGTCAAGCCCAACTCGAGTGAACTGAGCTACCTGCTCTTTTACGCCACCTCGCGACGATCAAAGATACAAAAAGTAGGCAGCTTTCTCGAGAAGAAGACAGCCAGCGATGTCTGGCGCCTGCGGATTGGCAATGTCCAGGTTACCCTGCAGATCATCGCCGCCCTGATTGAGAAATCCCCCAAAGATTTCCCGTTATTTGCGCAAAATGTCATCAAAGTGCTGAGTCTTGTACTGCGTTCCGCCGATATCACCATGATCGAGGCATCACTGCCTACGTTTGAGACATTCTGCGAACACCACGATGCCTCCTCG…	3324	MNAIQQKCRPKHQVLVLKCYPRTTKGAVDVKPNSSELSYLLFYATSRRSKIQKVGSFLEKKTASDVWRLRIGNVQVTLQIIAALIEKSPKDFPLFAQNVIKVLSLVLRSADITMIEASLPTFETFCEHHDASSLFADQSYVRQYEDIVRQYATFASTRQTPGKGTPSKPVALRWRNAGLAAIRSVAESDALSSVAGRQLDVIVPMILENLWSDDDGFLDLLAHRMKSEEKGDAAVLLRRRTSISTVKTAEEPGDTNPIALSGSAADADALAEEETGLLAMQCLKQIFVIPNRAQLHGATQAILQFLRERVQQNETLVQTDDRTKRDSGWAVKIYGLAAQWAPVQDRYVILVTALDAFVHTQPNNEHVAEQIVLVALVSSLLRSEVNLIGLSIMDVLLGL…	1107
PvATG39	ATGCGTTCAGGCGCCTTTGGCGGCTTCGCACTTGCTGCTCTGCTCTCTGGAGCATCAGCACAGTCCTATGGTAATCCCGGAGCCTCTGGCCAAGGTCAGCCTAGTGATGGCGGATCATCTTCTCCTGGCAGCAGCCCTGCTGGCAGTGGTCCTGGTAACGGTTCCCCCAATGGTCCTGGTAATGGTTCTCCCAATGGTCCTGGCAATGGTTCTCCCTTGACGGTTTCTCCTGTTGTTCTCACGTGTCCCATTGTCCCACCCAGTACGGTCTTCGTCACTGTTACTCCTCCTGCACTCGCTACTGCCACAGTTACTTCTCCTGCTGGGCCCAACGGTTCGAATCTGCCATATGATCCCAACGGTCCCTTTGGCGGCTCACTCCCTCACACCGGACCATAC…	4221	MRSGAFGGFALAALLSGASAQSYGNPGASGQGQPSDGGSSSPGSSPAGSGPGNGSPNGPGNGSPNGPGNGSPLTVSPVVLTCPIVPPSTVFVTVTPPALATATVTSPAGPNGSNLPYDPNGPFGGSLPHTGPYPPSPFGAGSSPSNTVSIPCSTDSGAGPNGAGSPGSGHSATAAQLTTDYVTMSLPPLGGQTVGSMITYTIITPLVSNNGGNGATSPHGVPSTSPGGSVAGQPAPTVTQPANQPGAGNPGGQGLPTVTVTVTTPQGGVPGSVGSGSNPNDPGSYGFGSGPNPGGNGSGSNPSNGNGPNPGGNGSGSNPGSGTGSNPGSNGSGSNPTIGNPGGQGVPSSSTPCETDTATVTIPGGNGAGNGPSNAPGGQDLSSVPVTVTVTVPASSSGL…	1406
PvATG42	ATGAGAGTAGCGACTTCGACGCTACTGCTCGGCGCAGCCTCTGTTGCTGTTGCCTCGCATGAGCAGATTGTCCTGGGCGGTTACCAGGATGCCGTCAAGCCCATTATTGAGTCGAGCTCAAAGTCTGCCGGCTCTATCCTTGAGAAGATCGAGGAAACCCTCGGCAAGATGCCCTCCGAGGCACAGGGCCTCTGGGACGAGATGCAGCTCCTGGTCCCTGGCTTCATGGAGAAGGCACAGAACCTGATCTCGCTTCCCAAGGCGCACAAGCGCCGGCCCGACAGCGAGTGGGAGCACGTCGTCAAGGGCGCTGACATTCAGTCCATGTGGACCAAGACGGCAGGCGAAGAGCACCGTGTTATTGACGGCCAGCTTGAGGCCTACAACCTGCGCGCTCAG…	1650	MRVATSTLLLGAASVAVASHEQIVLGGYQDAVKPIIESSSKSAGSILEKIEETLGKMPSEAQGLWDEMQLLVPGFMEKAQNLISLPKAHKRRPDSEWEHVVKGADIQSMWTKTAGEEHRVIDGQLEAYNLRAQKVDPSVLGVDKVKQYSGYLDDEANDKHLFYWFFESRNDPKNDPVVLWLNGGPGCSSMMGLFMELGPSSVDSKLKLKYNDFSWNQNASVIFIDQPVNTGYSYSGRSVSDTVAASKDIYALLTLFFHNFPEYATQDFHISGESYAGHYIPVFANEILSHKQRNINLKSIAIGNGLTDPKTQYAEYRPMACGDDGSHYGPILDEGECQSMDNALPRCQSLIQNCYDSGSAWSCVPSAIYCNNALIGPFQRSGYNVYDIREKCKDQANLC…	549
PvACT3	ATGGTTGGCAAAGTGAGCGAGCGTGTCCTCCTGCGGGAAGGGCTCGAGAGGACGGACAATGGCATGAAACAGACCAACTGGCCCGACGTCTCGGCCATCAACCAGAAGAACTACTACACCGATTATATGAAGCGCGATGATCAGGTCCTAGCATTACGACTTCAGGCCGAGGCTAACAGAGCTCTGCTCGTCCAGAGTGCCAAGGACCGCGACAGAGCCCTTGCCCGAGGCGGTCACGGCGATGTTGCTCTGCCGCTCCCAGACGCGGAGCAGGAGGAAAGCGCGGCTGCCAACGACCCCAATGCACTGCTTGACCCTAGCAAGATCATCGTCATCCACCCTGGCAGCCAGAATCTGAGGATAGGCTACGCCAGCGATGCCCTGCCCAGGTCCATCCCT…	2226	MVGKVSERVLLREGLERTDNGMKQTNWPDVSAINQKNYYTDYMKRDDQVLALRLQAEANRALLVQSAKDRDRALARGGHGDVALPLPDAEQEESAAANDPNALLDPSKIIVIHPGSQNLRIGYASDALPRSIPTTLATKFPQTESEMHEALPRRKFEGKNQDEIHGEDWSKKYQKLSADLKVDMRANKRKVLPNSKELVTNYNRRTEPEKIPTHNDPLQIEWTDIETLQDPNSPASAFIGQAAMRVPDDSNPKFKLWWPIQHGWLNEDEYTSAEHLFDDFETLLDKAIREELGLTTNSVWKEYSCVFVIPDLYDKRYVEAVLQSCMNWFEFKRICFIQESIAGSFGAGYTQACVVDVGAQKTSIACVEDGLMIEDSRINMKFGGYDVTETFIKMMLYDQ…	741
